# Supplementary material
Source: MDPI journal article supplement (https://www.mdpi.com/2571-9408/6/4/194)
Supplement: s1 [file s1]

**Table 3.** Concentrations of main elements identified by pXRF.

| Sample | Colour              | Mg    | Al    | Si     | P    | S     | K    | Ca    | Ti   | V    | Mn   | Cr   | Fe    | Co   | Ni   | Cu    | Zn   | As   | Sb   | W    | Hg   | Pb    | Bi   |
|--------|---------------------|-------|-------|--------|------|-------|------|-------|------|------|------|------|-------|------|------|-------|------|------|------|------|------|-------|------|
| 26     | Colourless (ground) | <LOD  | 10157 | 308972 | <LOD | 860   | 962  | 32036 | 490  | 32   | 3136 | <LOD | 3528  | <LOD | <LOD | 57    | 32   | 16   | 3653 | <LOD | <LOD | 120   | <LOD |
| n12    | red                 | <LOD  | 3833  | 155444 | 187  | <LOD  | 442  | 22201 | <LOD | 79   | 2117 | 151  | 22562 | <LOD | <LOD | 1270  | 27   | 153  | 5124 | <LOD | <LOD | 753   | <LOD |
| n20    | red                 | <LOD  | 8558  | 129532 | 831  | 5542  | 1729 | 16613 | <LOD | 104  | 1264 | <LOD | 31627 | <LOD | <LOD | 2694  | 65   | 1504 | 5867 | <LOD | <LOD | 16397 | <LOD |
| n21    | red                 | <LOD  | 10194 | 170058 | 1203 | 2031  | 1856 | 21488 | 577  | <LOD | 1485 | <LOD | 47757 | <LOD | <LOD | 5562  | 102  | 295  | 5320 | <LOD | <LOD | 1966  | <LOD |
| 2      | red                 | <LOD  | 12718 | 157974 | 2363 | 10592 | 1991 | 17664 | <LOD | 59   | 1576 | <LOD | 26905 | <LOD | <LOD | 413   | 53   | 1834 | 4595 | <LOD | <LOD | 12565 | <LOD |
| 5      | red                 | <LOD  | 11242 | 159788 | 1821 | 8498  | 1590 | 21703 | 312  | <LOD | 1825 | <LOD | 31227 | <LOD | <LOD | 6530  | 107  | 703  | 4507 | <LOD | <LOD | 4459  | <LOD |
| 17     | red                 | <LOD  | 8650  | 194691 | 2101 | 2465  | 2056 | 23855 | 414  | <LOD | 2077 | 75   | 36506 | <LOD | <LOD | 1580  | 55   | 82   | 4473 | <LOD | <LOD | 821   | 17   |
| 27     | red                 | <LOD  | 10504 | 148236 | 2070 | 3459  | 927  | 19062 | 319  | <LOD | 1527 | <LOD | 59304 | <LOD | <LOD | 1109  | 64   | 146  | 3892 | 20   | 13   | 821   | <LOD |
| n2     | brown               | <LOD  | 13668 | 167501 | 1207 | 291   | 1703 | 20057 | 334  | 85   | 2386 | <LOD | 30011 | <LOD | <LOD | 206   | 46   | 42   | 4152 | <LOD | 12   | 255   | 23   |
| n3     | brown (dark)        | <LOD  | 17292 | 100187 | 2086 | 284   | 2286 | 11659 | 1213 | 46   | 1679 | <LOD | 53968 | <LOD | <LOD | 375   | 102  | 80   | 4589 | <LOD | <LOD | 488   | <LOD |
| n7     | brown               | <LOD  | 4530  | 123569 | <LOD | 345   | 428  | 21635 | 486  | <LOD | 2075 | <LOD | 20817 | <LOD | <LOD | 4777  | 76   | 99   | 5197 | <LOD | 29   | 678   | <LOD |
| n9     | brown               | 23447 | 22425 | 183652 | 1810 | 2037  | 1272 | 17664 | 638  | 32   | 2216 | 65   | 13749 | <LOD | <LOD | 193   | 80   | 32   | 3714 | <LOD | <LOD | 213   | <LOD |
| n17    | brown               | <LOD  | 19724 | 160897 | 1619 | 1214  | 2078 | 18615 | 724  | <LOD | 1601 | <LOD | 49905 | <LOD | <LOD | 2147  | 66   | 90   | 4610 | <LOD | <LOD | 853   | 27   |
| n23    | brown               | 13352 | 28441 | 184620 | 5070 | 2926  | 6297 | 23281 | 635  | 38   | 2985 | <LOD | 7605  | <LOD | <LOD | 182   | 67   | 88   | 3447 | <LOD | <LOD | 327   | 15   |
| n24    | brown               | <LOD  | 21756 | 132273 | 2834 | 6123  | 4201 | 13764 | 1344 | <LOD | 1747 | <LOD | 9127  | <LOD | <LOD | 240   | 61   | 2189 | 4263 | <LOD | <LOD | 15015 | <LOD |
| n25    | brown               | <LOD  | 16288 | 74099  | 3099 | 11575 | 4338 | 9827  | <LOD | <LOD | 862  | <LOD | 8119  | <LOD | <LOD | 363   | 92   | 4450 | 7778 | <LOD | <LOD | 40549 | <LOD |
| 1      | brown               | <LOD  | 22139 | 99524  | 9014 | 7955  | 2401 | 16571 | 200  | 73   | 1774 | <LOD | 50660 | <LOD | <LOD | 464   | 92   | 242  | 4246 | 26   | <LOD | 1159  | <LOD |
| 3      | brown               | <LOD  | 11729 | 99978  | 2496 | 36060 | 1364 | 11551 | 256  | <LOD | 712  | 117  | 14553 | <LOD | <LOD | 767   | 70   | 5715 | 7127 | <LOD | <LOD | 46865 | <LOD |
| 4      | brown               | <LOD  | 12236 | 162960 | 3184 | 16760 | 1332 | 17364 | 1032 | 46   | 934  | 84   | 12927 | <LOD | <LOD | 16953 | 205  | 1348 | 5154 | <LOD | <LOD | 11495 | <LOD |
| 8      | brown (mid)         | 17440 | 11761 | 75399  | 2124 | 40961 | 580  | 8061  | 262  | <LOD | 516  | 53   | 5542  | <LOD | <LOD | 934   | 39   | 6293 | 7762 | <LOD | <LOD | 54009 | <LOD |
| 9      | brown (dark)        | <LOD  | 8266  | 158328 | 1941 | 18832 | 1015 | 20428 | 532  | <LOD | 385  | <LOD | 15504 | <LOD | <LOD | 21480 | 124  | 1358 | 7630 | 58   | <LOD | 40340 | <LOD |
| 11     | brown (dark)        | <LOD  | 10781 | 231156 | 1877 | 6447  | 1197 | 27506 | 336  | <LOD | 2343 | 63   | 6076  | <LOD | <LOD | 4038  | 36   | 95   | 3999 | <LOD | <LOD | 474   | <LOD |
| 19     | brown               | <LOD  | 9139  | 112282 | 2955 | 22894 | 735  | 12971 | 322  | <LOD | 984  | <LOD | 5131  | <LOD | <LOD | 537   | 41   | 4193 | 6155 | 51   | <LOD | 30275 | <LOD |
| 23     | brown               | <LOD  | 12999 | 143648 | 4789 | 10412 | 981  | 18048 | 353  | <LOD | 1297 | <LOD | 4291  | <LOD | <LOD | 3313  | 57   | 2144 | 5154 | <LOD | <LOD | 17831 | 49   |
| n4     | fleshtone           | <LOD  | 3815  | 166257 | <LOD | <LOD  | 711  | 21766 | <LOD | <LOD | 2579 | <LOD | 12164 | <LOD | <LOD | 400   | 25   | 129  | 4283 | 25   | <LOD | 379   | <LOD |
| n11    | fleshtone           | 34323 | 17071 | 193686 | 1044 | 1613  | 1096 | 20512 | 888  | <LOD | 2335 | <LOD | 17802 | <LOD | <LOD | 231   | 60   | 47   | 4059 | <LOD | <LOD | 301   | <LOD |
| n16    | fleshtone           | <LOD  | <LOD  | 26441  | <LOD | <LOD  | <LOD | 10091 | 1654 | 132  | 1592 | <LOD | 26010 | <LOD | <LOD | 4293  | <LOD | 761  | 8689 | <LOD | <LOD | 8448  | 136  |
| 7      | fleshtone           | 13209 | 17949 | 175027 | 7316 | 5647  | 1750 | 21632 | 626  | 130  | 2438 | <LOD | 12716 | <LOD | <LOD | 574   | 43   | 93   | 3635 | <LOD | <LOD | 677   | <LOD |
| 14     | fleshtone           | <LOD  | 13675 | 188839 | 7030 | 3266  | 1901 | 23663 | 843  | 132  | 2062 | <LOD | 21062 | <LOD | <LOD | 837   | 69   | 130  | 3842 | 19   | <LOD | 495   | <LOD |

|     |              |       |       |        |      |       |      |       |      |      |      |      |       |      |      |       |      |      |      |      |      |       |      |
|-----|--------------|-------|-------|--------|------|-------|------|-------|------|------|------|------|-------|------|------|-------|------|------|------|------|------|-------|------|
| 10  | cream        | <LOD  | 9269  | 244461 | 1577 | 2542  | <LOD | 25627 | 679  | <LOD | 1826 | 72   | 4332  | <LOD | <LOD | 246   | 22   | 133  | 3631 | <LOD | <LOD | 522   | <LOD |
| 12  | cream-white  | <LOD  | 12548 | 228023 | 3835 | 5187  | <LOD | 23964 | 410  | 70   | 1414 | <LOD | 12861 | <LOD | <LOD | 7581  | 110  | 135  | 4138 | 24   | <LOD | 1324  | <LOD |
| n1  | blue         | <LOD  | 16801 | 182668 | 788  | 7869  | 1550 | 18897 | 437  | <LOD | 840  | 52   | 7488  | <LOD | <LOD | 12432 | 124  | 1717 | 5062 | <LOD | <LOD | 10790 | <LOD |
| n6  | blue         | <LOD  | <LOD  | 150980 | <LOD | <LOD  | <LOD | 25136 | <LOD | <LOD | 3136 | 82   | 13150 | <LOD | <LOD | 2354  | 18   | 57   | 4825 | 23   | <LOD | 352   | <LOD |
| n10 | blue         | <LOD  | 6453  | 257530 | 249  | 1962  | 924  | 31400 | 437  | <LOD | 3329 | <LOD | 4106  | 97   | <LOD | 3105  | 33   | 150  | 4147 | <LOD | <LOD | 1227  | <LOD |
| n14 | blue         | <LOD  | <LOD  | 69176  | <LOD | <LOD  | <LOD | 19249 | <LOD | <LOD | 2620 | <LOD | 8734  | <LOD | <LOD | 2166  | <LOD | 328  | 6836 | 52   | <LOD | 1741  | <LOD |
| n15 | blue         | <LOD  | <LOD  | 19711  | <LOD | <LOD  | <LOD | 13103 | <LOD | <LOD | 3504 | <LOD | 10433 | <LOD | <LOD | 123   | <LOD | 127  | 6609 | <LOD | <LOD | 629   | <LOD |
| n22 | blue         | 10096 | 8657  | 230059 | 569  | 1318  | 1415 | 31592 | 737  | 68   | 2537 | 74   | 4973  | 183  | <LOD | 6818  | 60   | 154  | 4462 | <LOD | <LOD | 849   | <LOD |
| 6   | blue         | <LOD  | 8989  | 225668 | 1363 | 5070  | 1479 | 30326 | 822  | <LOD | 2293 | 82   | 7990  | 202  | 29   | 8616  | 42   | 260  | 4541 | <LOD | <LOD | 2075  | <LOD |
| 15  | blue         | <LOD  | 9186  | 160635 | 2278 | 9022  | 1858 | 24537 | 714  | <LOD | 1722 | <LOD | 21752 | 273  | 20   | 15282 | 130  | 875  | 7040 | <LOD | <LOD | 5197  | <LOD |
| 20  | blue (dark)  | <LOD  | 10241 | 199790 | 4118 | 5095  | 2396 | 31265 | 1455 | <LOD | 2313 | 62   | 12496 | 402  | 54   | 13279 | 107  | 288  | 5762 | <LOD | 13   | 1800  | <LOD |
| 21  | blue (light) | <LOD  | 7658  | 203443 | 2215 | 3962  | 2206 | 32639 | 1072 | <LOD | 2161 | 82   | 8275  | 755  | 56   | 18058 | 85   | 407  | 6784 | <LOD | <LOD | 2743  | <LOD |
| 24  | blue         | <LOD  | 13197 | 214738 | 1107 | 3404  | 1565 | 32274 | 854  | 73   | 2564 | <LOD | 5705  | 257  | <LOD | 10179 | 44   | 188  | 4503 | <LOD | <LOD | 1020  | <LOD |
| n5  | yellow       | <LOD  | 9527  | 145054 | 588  | 4074  | 424  | 19045 | 639  | <LOD | 1688 | <LOD | 6117  | <LOD | <LOD | 4689  | 72   | 792  | 4443 | <LOD | <LOD | 6009  | <LOD |
| n8  | yellow       | <LOD  | 19911 | 195566 | 907  | 13429 | 1831 | 18391 | <LOD | <LOD | 1631 | <LOD | 5340  | <LOD | <LOD | 283   | 41   | 2193 | 4092 | <LOD | 27   | 15369 | <LOD |
| n13 | yellow       | <LOD  | <LOD  | 67956  | <LOD | <LOD  | <LOD | 17406 | 2261 | <LOD | 2052 | <LOD | 12514 | <LOD | <LOD | 2777  | 87   | <LOD | 6748 | <LOD | <LOD | 573   | <LOD |
| n18 | yellow       | <LOD  | 20508 | 197371 | 1497 | 9626  | 1715 | 19830 | 1270 | <LOD | 1279 | <LOD | 8409  | 145  | <LOD | 7033  | 41   | 1982 | 6013 | <LOD | <LOD | 13635 | <LOD |
| n19 | yellow-cream | <LOD  | 14120 | 104425 | 924  | 18462 | 1992 | 10459 | 1177 | <LOD | 584  | 57   | 6519  | <LOD | <LOD | 509   | 70   | 4866 | 7795 | <LOD | <LOD | 48470 | <LOD |
| 13  | yellowish    | <LOD  | 9124  | 152785 | 1668 | 20578 | <LOD | 14987 | 616  | <LOD | 725  | <LOD | 6787  | <LOD | <LOD | 8738  | 185  | 2831 | 5225 | <LOD | 65   | 17526 | <LOD |
| 16  | yellow       | <LOD  | 7874  | 124483 | 1863 | 23349 | 1228 | 17804 | <LOD | 77   | 1172 | <LOD | 11303 | 185  | 36   | 10412 | 113  | 3227 | 9415 | <LOD | <LOD | 24662 | 40   |
| 18  | yellow       | <LOD  | 7630  | 168973 | 2393 | 11890 | 904  | 21080 | 320  | 36   | 2084 | <LOD | 6800  | <LOD | <LOD | 709   | 34   | 1479 | 4656 | <LOD | <LOD | 8822  | <LOD |
| 22  | yellow       | <LOD  | 7872  | 222973 | 1966 | 5120  | 844  | 25019 | 777  | <LOD | 2509 | <LOD | 3436  | <LOD | <LOD | 472   | 12   | 833  | 3778 | 23   | <LOD | 7061  | <LOD |
| 25  | yellow       | <LOD  | 14692 | 237787 | 1438 | 11442 | 1550 | 25989 | 516  | 43   | 2748 | <LOD | 3810  | <LOD | <LOD | 499   | 44   | 636  | 3687 | 26   | <LOD | 2814  | <LOD |
